# Supplementary material for: Genomic Regions From an Iranian Landrace Increase Kernel Size in Durum Wheat
Source: Front Plant Sci. 2019 Apr 18;10:448. doi: 10.3389/fpls.2019.00448 (PMC6482228; doi:10.3389/fpls.2019.00448)
Supplement: Supplementary Table 6 — Genes controlling kernel related phenotypes (TKW, L, W) identified in wheat and/or rice. Gene name, gene ID, wheat chromosome and the physical position on the T. durum reference genome are reported. [file Table_6.XLSX]

## Sheet: Foglio1
Rice gene	Wheat gene	Wheat chr.	Start-End on Svevo genome (bp)	ID of the Svevo gene	%	References
(gene ID)	(gene ID)				identity
	TaSAP-A1 (KC193579)	7B	528343886-528343099	TRITD7Bv1G166760	97,21	Chang et al., 2013
		7A	581186556-581185767	TRITD7Av1G217610.1	96,84
	TaGS1b (DQ124210)	6A	525603850-525603539	TRITD6Av1G185050	93,84	Bernard et al., 2008
		6B	553792479-553792174	TRITD6Bv1G174320	99,79
	6-SFT-A2 (FJ228688,1)	7A	2804757-2807893	TRITD7Av1G001560	91,97	Yue et al., 2015
		4A	730723774-730726913	TRITD4Av1G261410	89,97
	TaSus2 (AJ000153)	2B	169017304-169016983	TRITD2Bv1G065410	99,07	Jiang et al., 2011; Hou et al., 2014
		2A	120336304-120335983	TRITD2Av1G053920	97,83
	TaSus1 (AJ001117)	7B	68819710-68820032	TRITD7Bv1G024970	98,77	Jiang et al., 2011; Mohler et al., 2016
		7A	111462985-111462663	TRITD7Av1G050690	98,15
TGW6 (Os06g0623700)	TaTGW6 (KT582298)	4A	666395284-666396939	TRITD4Av1G238170	99,21	Hu et al., 2016; Hanif et al., 2015; Ishimaru et al., 2013
GS3 (Os03g0407400)	TaGS D1 (KF687956,1)	7A	6467996-6467368	TRITD7Av1G003700	91,73	Zhang et al., 2014; Fan et al., 2006; Mao et al., 2010; Takano-kai et al., 2009
GW2 (Os02g0244100)	TaGW2-A1, TaGW2-6A (KF176551,1)	6A	235270703-235295248	TRITD6Av1G091060	99	Zhai et al., 2018; Simmonds et al., 2016; Song et al., 2007
		6B	300808374-300791561	TRITD6Bv1G096950	99
GS5 (Os05g0158500)	TaGS5 (KX219726,1)	3A	182251443-182253720	TRITD3Av1G076080	99,82	Ma et al., 2016; Wang et al., 2015a; Li et al., 2011
		3B	231034675-231032624		93,9
GIF1 (Os04g0413500)	TaCwi-A1 (AF030420)	5B	693942186-693939429	TRITD5Bv1G250300	99,5	Ma et al., 2012; Wang et al., 2008
		4A	603888870-603889886	TRITD4Av1G209690	96
FLO2 (Os04g0645100)	TaFlo2-A1	2A	737202308-737200621	TRITD2Av1G276740	78,19	Sajjad et al., 2017; She et al., 2010
	TaFlo2-B1	2B	728958324-728956637	TRITD2Bv1G240770	78,37
OsCKX2 / Gn1a (Os01g0197700)	TaCKX6-D1 (JA797673)	3B	164239367-164240706	TRITD3Bv1G059800	91,52	Zhang et al., 2012a; Zuo and Li 2014; Ashikari et al., 2005
		3A	107426071-107424567	TRITD3Av1G048340	86,76
D1 (Os05g0333200)		7A	1598058-1597571	TRITD7Av1G000840	73	Ashikari et al., 1999
D2 (Os01g0197100)		3A	62643468-62642711	TRITD3Av1G031480	74	Hong et al., 2003
D11 (Os04g0469800)		2A	560602960-560604961	TRITD2Av1G202210	77	Tanabe et al., 2005
		2B	489842099-489844658	TRITD2Bv1G165560	77
D61 (Os01g0718300)		3A	462031527-462027681	TRITD3Av1G163790	81	Yamamuro et al., 2000
		3B	447492899-447496733	TRITD3Bv1G143630	82
GW5 (Os05g0187500)		1A	138091027-138092490	TRITD1Av1G057710	76	Shomura et al., 2008; Weng et al., 2008
		1B	181527596-181529089	TRITD1Bv1G065410	76
GW8/ OsSPL16 (Os08g0531600)		7A	249768275-249768729	TRITD7Av1G103100	94,64	Wang et al., 2012
		7B	223508880-223509719	TRITD7Bv1G077140	94,05
SRS1 (Os07g0616000)		2A	121243934-121241806	TRITD2Av1G054260	77,21	Abe et al., 2010
		2B	169982961-169980629	TRITD2Bv1G065910	76
SRS3 (Os05g0154700)		1A	88748570-88747063	TRITD1Av1G038700	80,67	Kitagawa et al., 2010
		1B	140384039-140385548	TRITD1Bv1G051340	80,67
SRS5 (Os11g0247300)		4A	563051888-563050402	TRITD4Av1G188370	85,91	Segami et al., 2012
		4B	45209595-45211077	TRITD4Bv1G018150	85,88
GIF2/AGPL2 (Os01g0633100)		1A	568600653-568600462	TRITD1Av1G222050	80,73	Wei et al., 2017
qGL3/OsPPKL1 (Os03t0646900)		5B	550457327-550458383	TRITD5Bv1G192150	81,41	Zhang et al., 2012b
GW7/SLG7 (Os07g0603300)		2B	180008653-180006995	TRITD2Bv1G069960	80,65	Wang et al., 2015b/c
		2A	134684064-134685727	TRITD2Av1G059560	80,46
GLW7/OsSPL13 (Os07g0505200)		2B	260530937-260530704	TRITD2Bv1G096640	81,86	Si et al., 2016
GS2/GLW2/GRF4 (Os02g0701300)		2A	681757822-681758011	TRITD2Av1G251570	90,53	Sun et al., 2017; Li et al., 2017
OsLG3/ERF62 (Os03g0183000)		4A	768032-767789	TRITD4Av1G000320	85,25	Yu et al., 2017
FUWA (Os02g0234200)		6B	373411421-373410761	TRITD6Bv1G115800	82,6	Chen et al., 2015
		6A	270173147-270190995	TRITD6Av1G100490	82
